# Supplementary material
Source: Springer Nature journal article supplement (https://www.springermedizin.de/resource/supplementary/13054_2010_8813_MOESM1_ESM.pdf/9732632)

Mortality rate

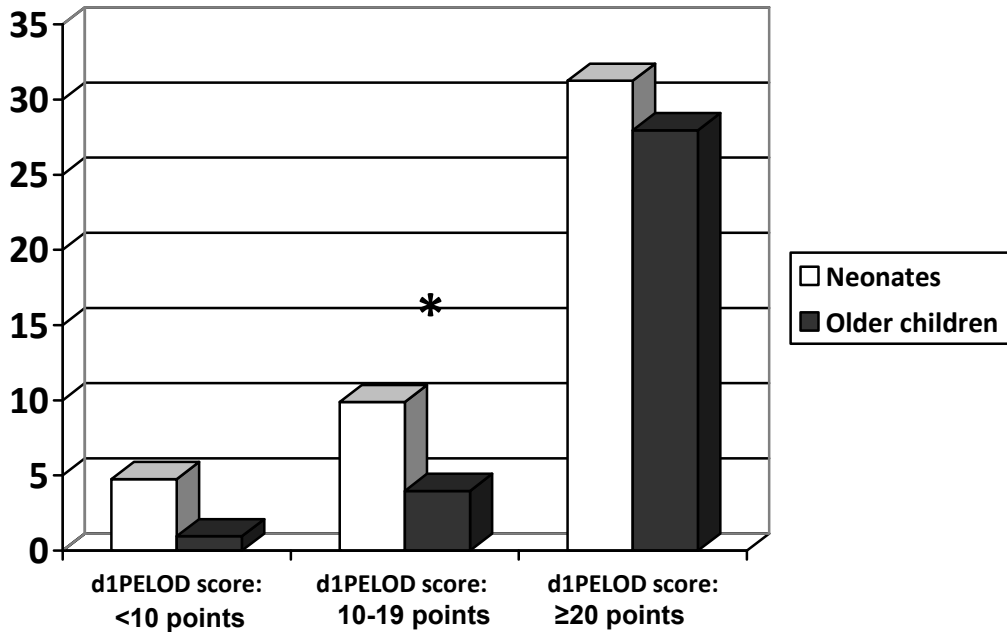

Supplement: MOESM1 [file 9732632]
